# Supplementary material for: Mouse models of human PIK3CA-related brain overgrowth have acutely treatable epilepsy
Source: eLife journal article supplement (doi:10.7554/elife.12703), 2015-12-03
Supplement: supp [file elife-12703-supp-v1.zip]

| Cre line          | Reference                               | Expression in brain                                       | Active in telencephalon from    | Reporter expression                                                                                                                                                                 |
|-------------------|-----------------------------------------|-----------------------------------------------------------|---------------------------------|-------------------------------------------------------------------------------------------------------------------------------------------------------------------------------------|
| a. Nestin-cre     | Tronche et al., 1999                    | Neural progenitors                                        | E11                             | 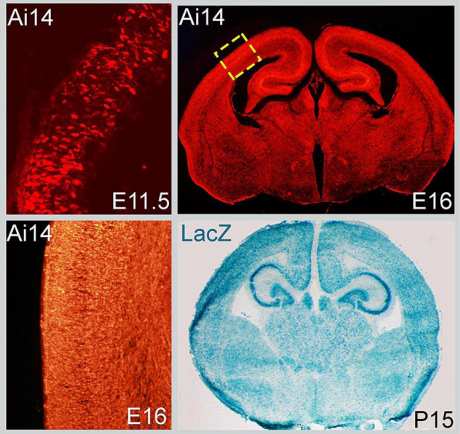 <p>Reporter expression for Nestin-cre: Ai14 (red) at E11.5 and E16, and LacZ (blue) at P15.</p> |
| b. hGFAP-cre      | Zhuo et al., 2001                       | Subset of neural progenitors                              | E13.5                           |  <p>Reporter expression for hGFAP-cre: Ai14 (red) at E14 and E16, and LacZ (blue) at P15.</p>   |
| c. Nestin-creERT2 | Imayoshi et al., 2006; Zhu et al., 2012 | Neural progenitors when induced at P0 and P1 by tamoxifen | 1 day after tamoxifen induction |  <p>Reporter expression for Nestin-creERT2: LacZ (blue) at P20.</p>                            |

Figure 1 - figure supplement 2
