# Supplementary figures and images for: Mouse models of human PIK3CA-related brain overgrowth have acutely treatable epilepsy
Source: eLife journal article supplement (doi:10.7554/elife.12703), 2015-12-03

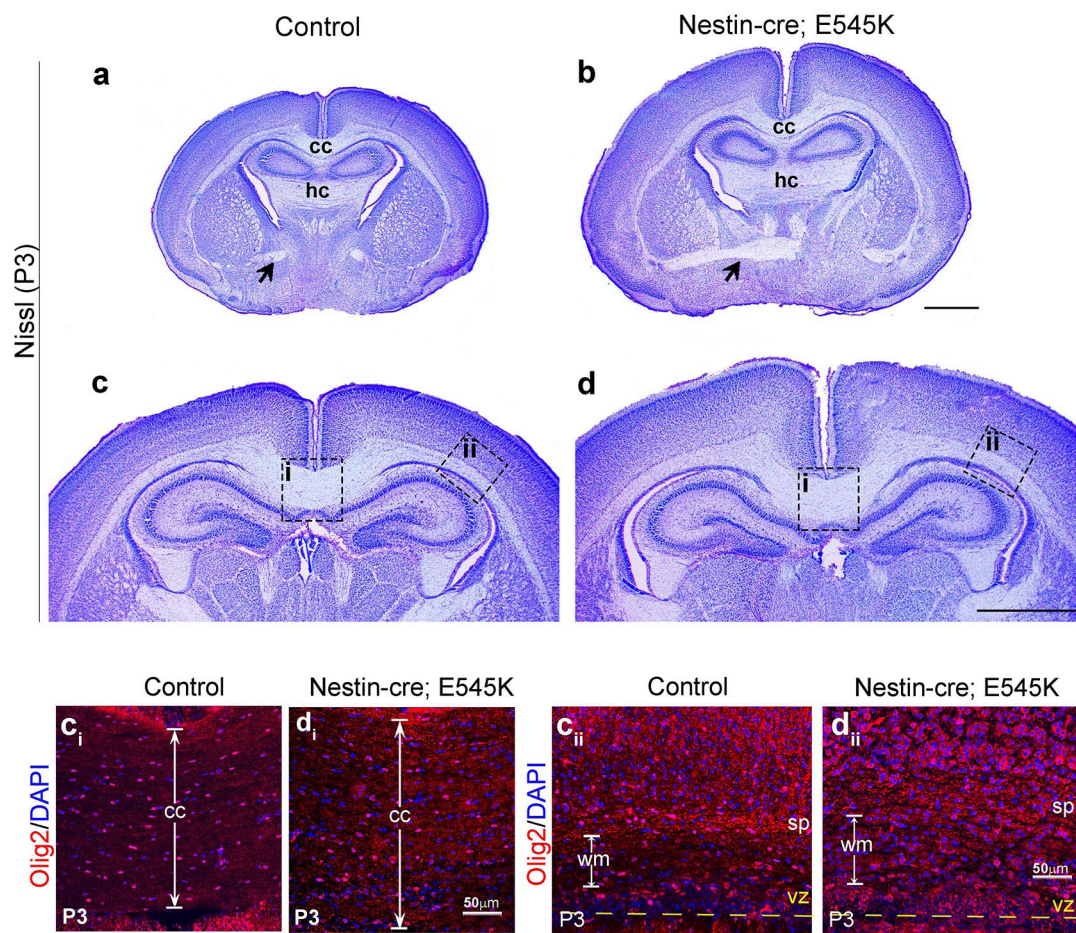

Figure 5 - figure supplement 2

Supplement: supp [file elife-12703-supp-v1.zip]

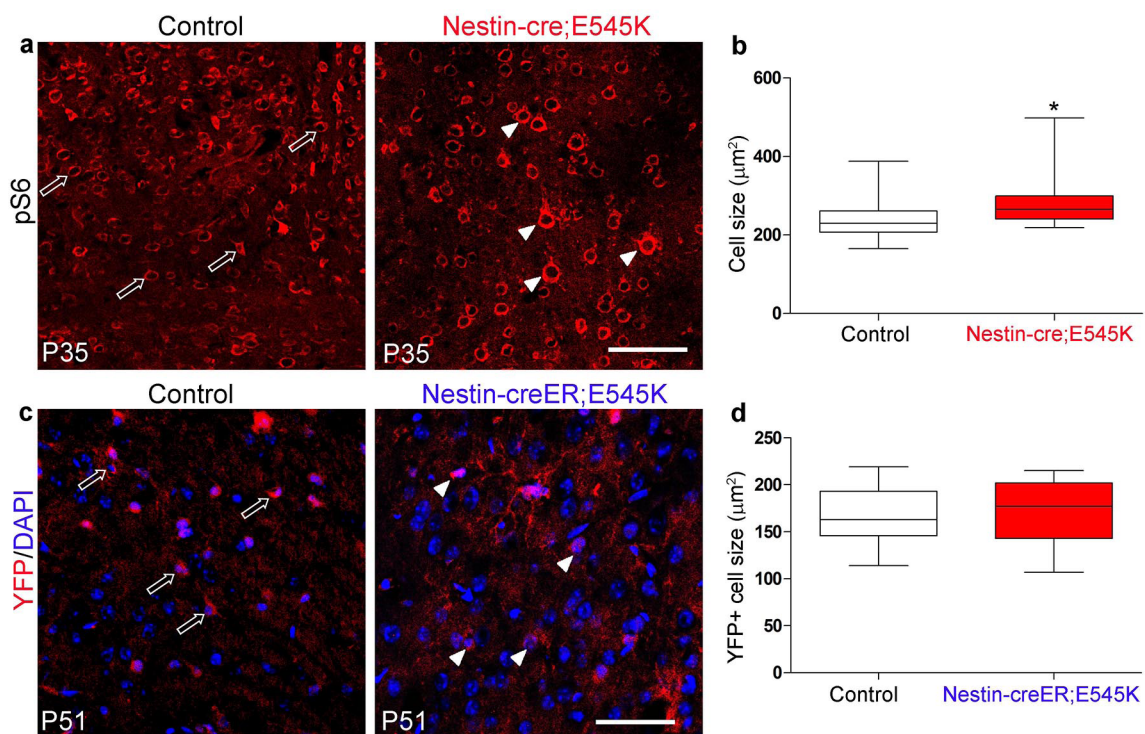

Figure 3 - figure supplement 2

Supplement: supp [file elife-12703-supp-v1.zip]

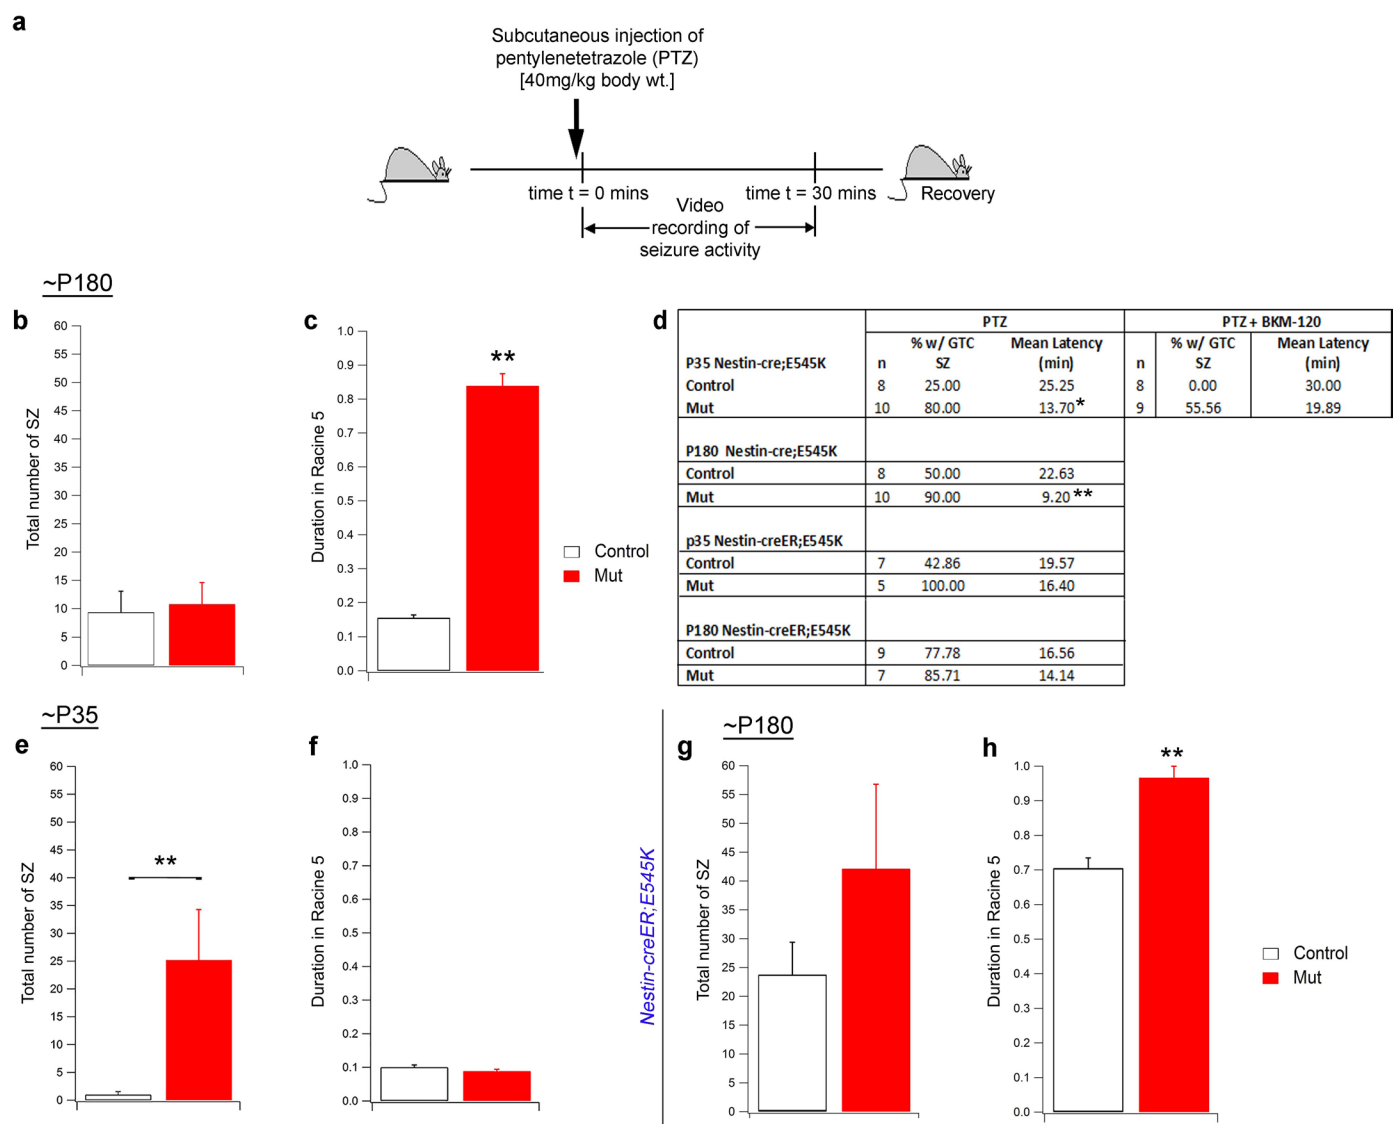

Figure 7 - figure supplement 1

Supplement: supp [file elife-12703-supp-v1.zip]

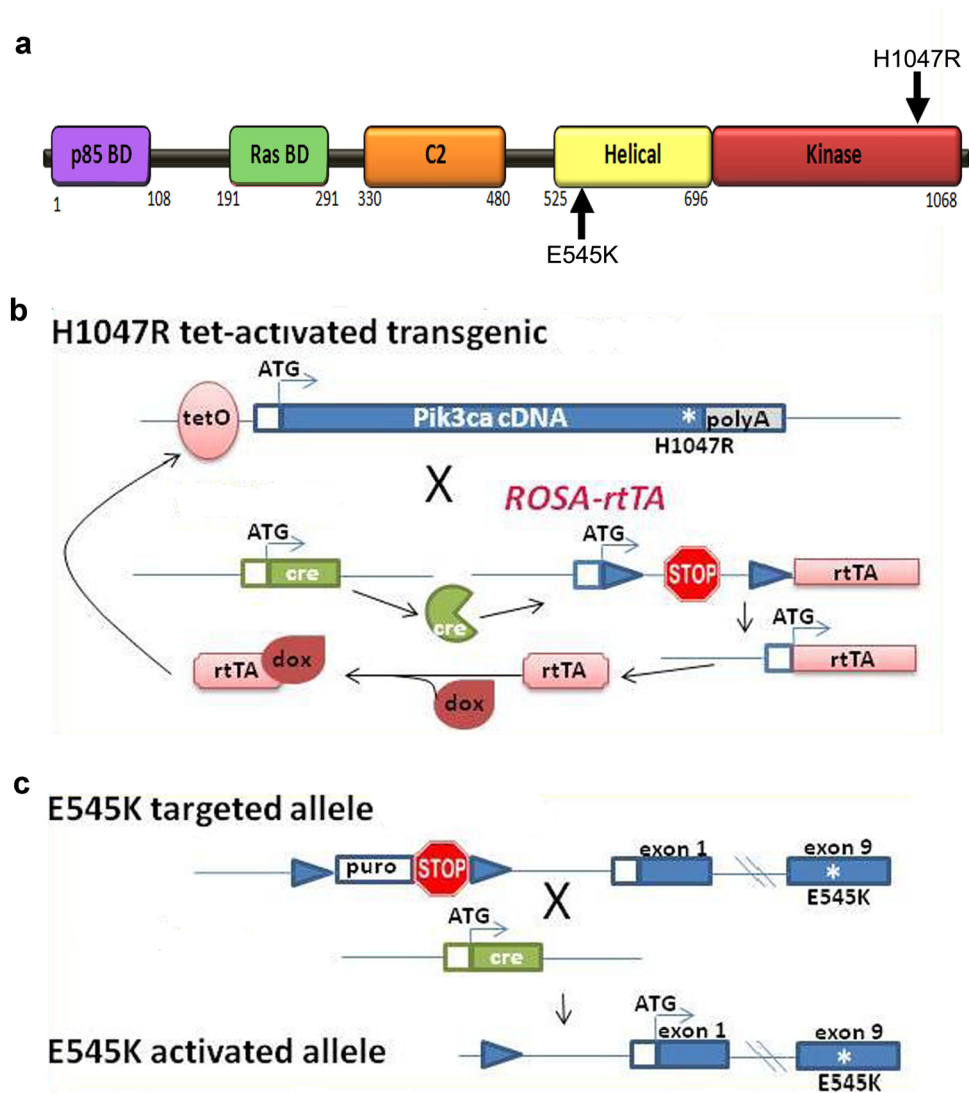

Figure 1 - figure supplement 1

Supplement: supp [file elife-12703-supp-v1.zip]

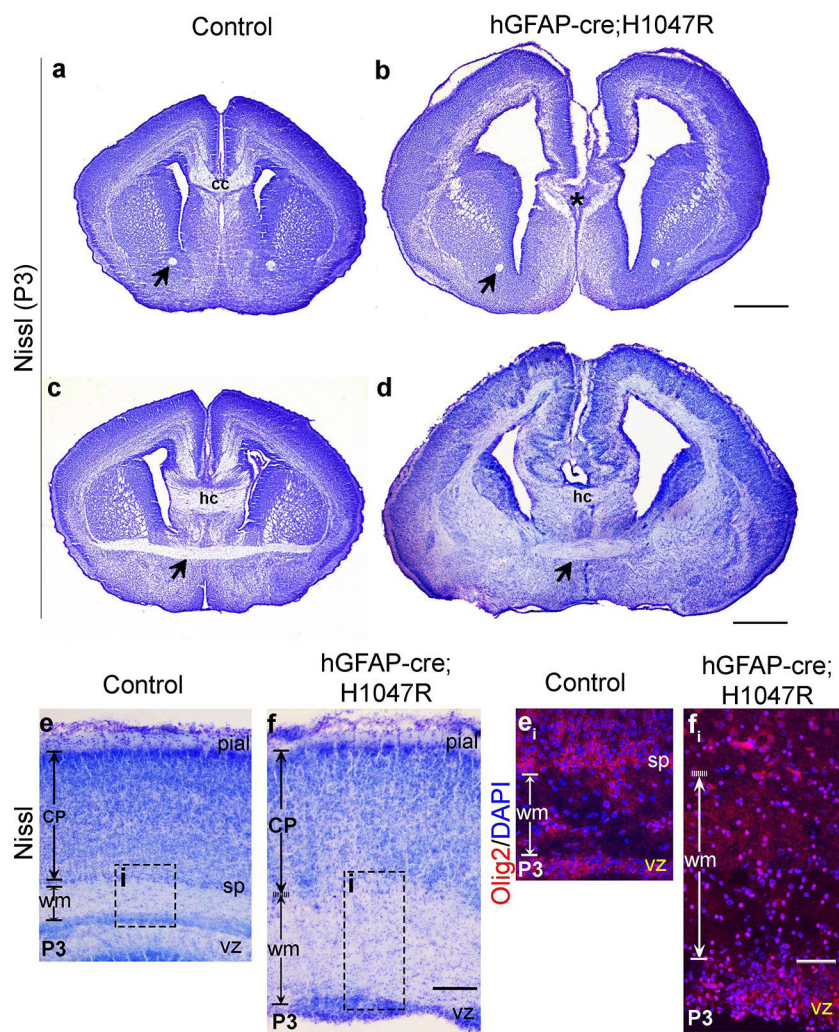

Figure 4 - figure supplement 2

Supplement: supp [file elife-12703-supp-v1.zip]

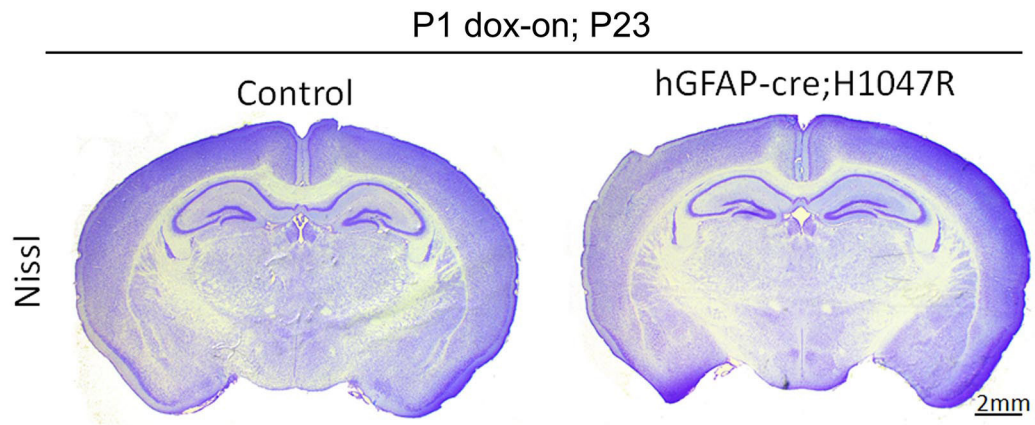

Figure 1- figure supplement 3

Supplement: supp [file elife-12703-supp-v1.zip]

Nestin/Laminin/DAPI

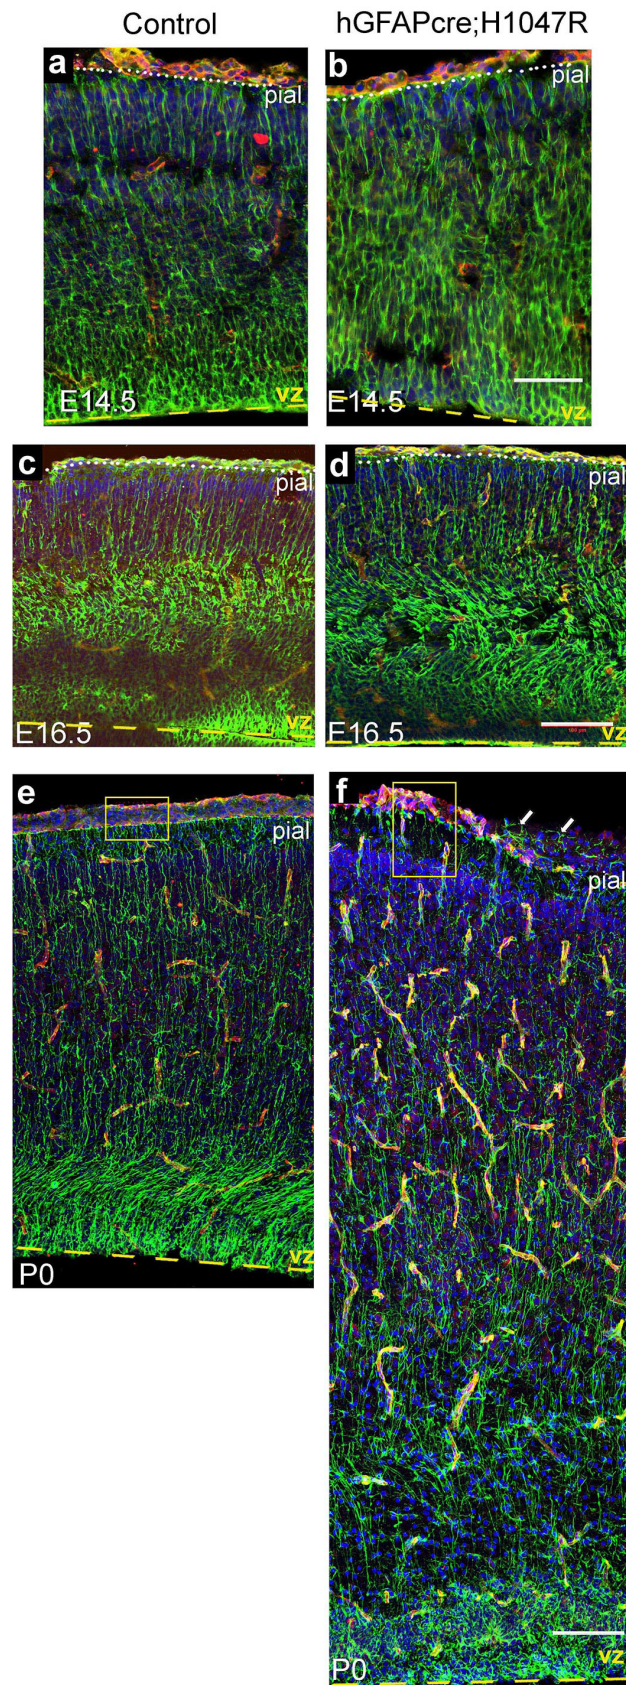

Figure 4 - figure supplement 1

Supplement: supp [file elife-12703-supp-v1.zip]

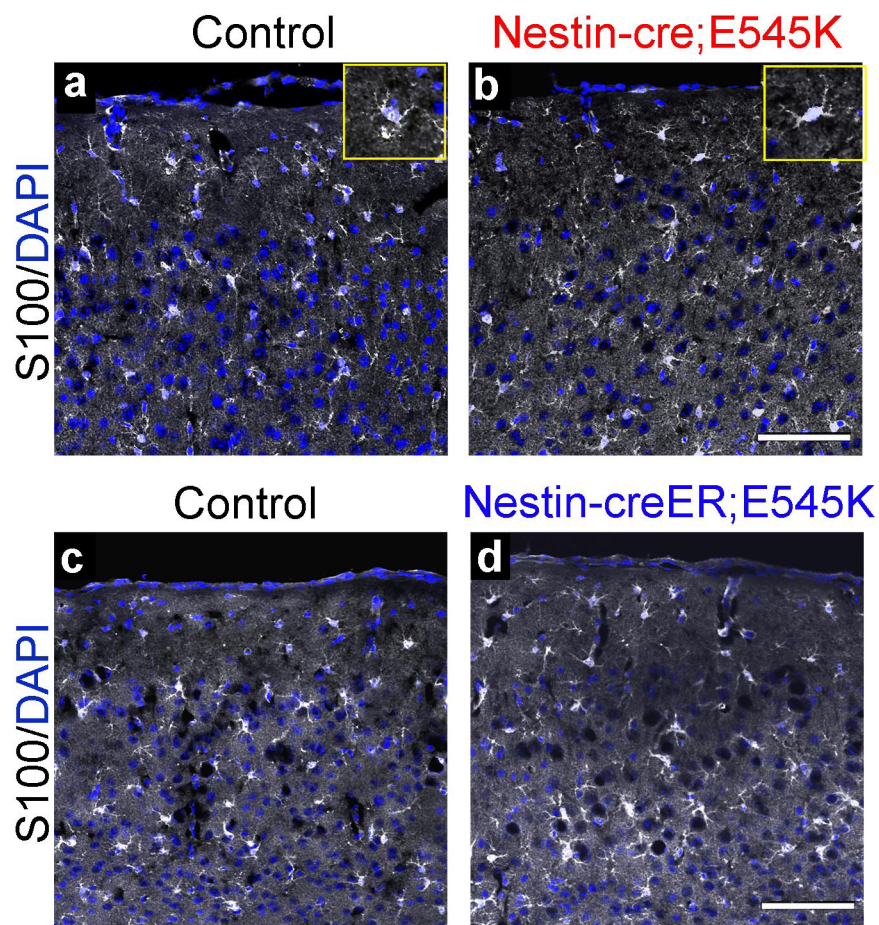

Figure 5 - figure supplement 3

Supplement: supp [file elife-12703-supp-v1.zip]

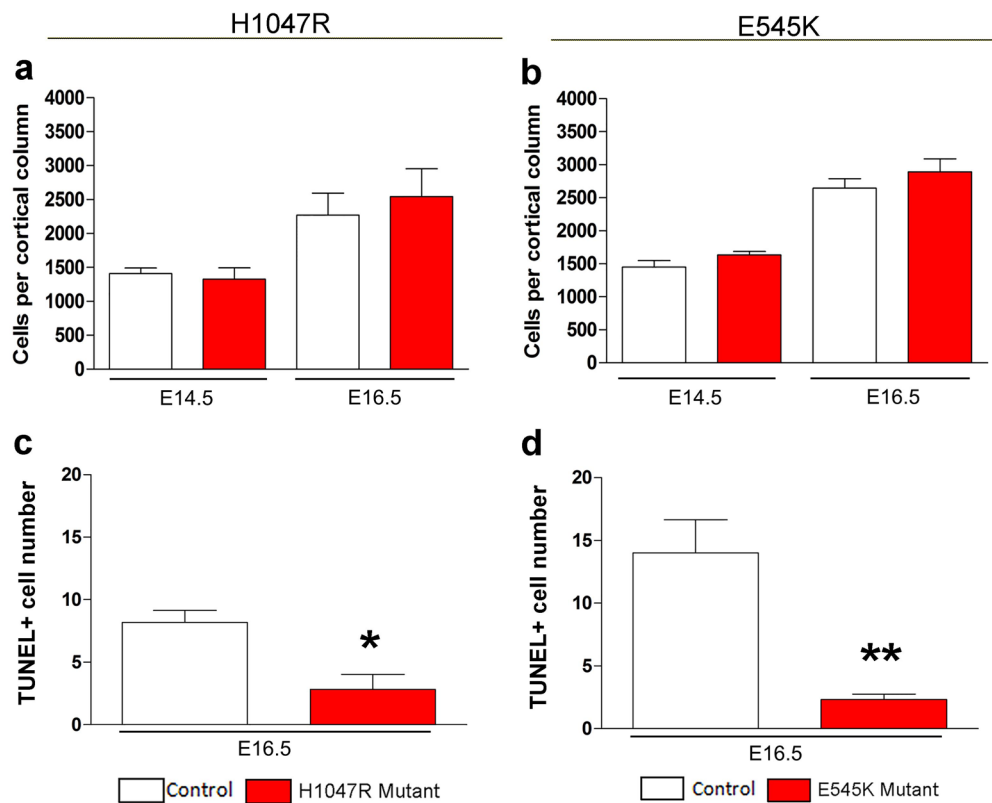

Figure 3 - figure supplement 1

Supplement: supp [file elife-12703-supp-v1.zip]

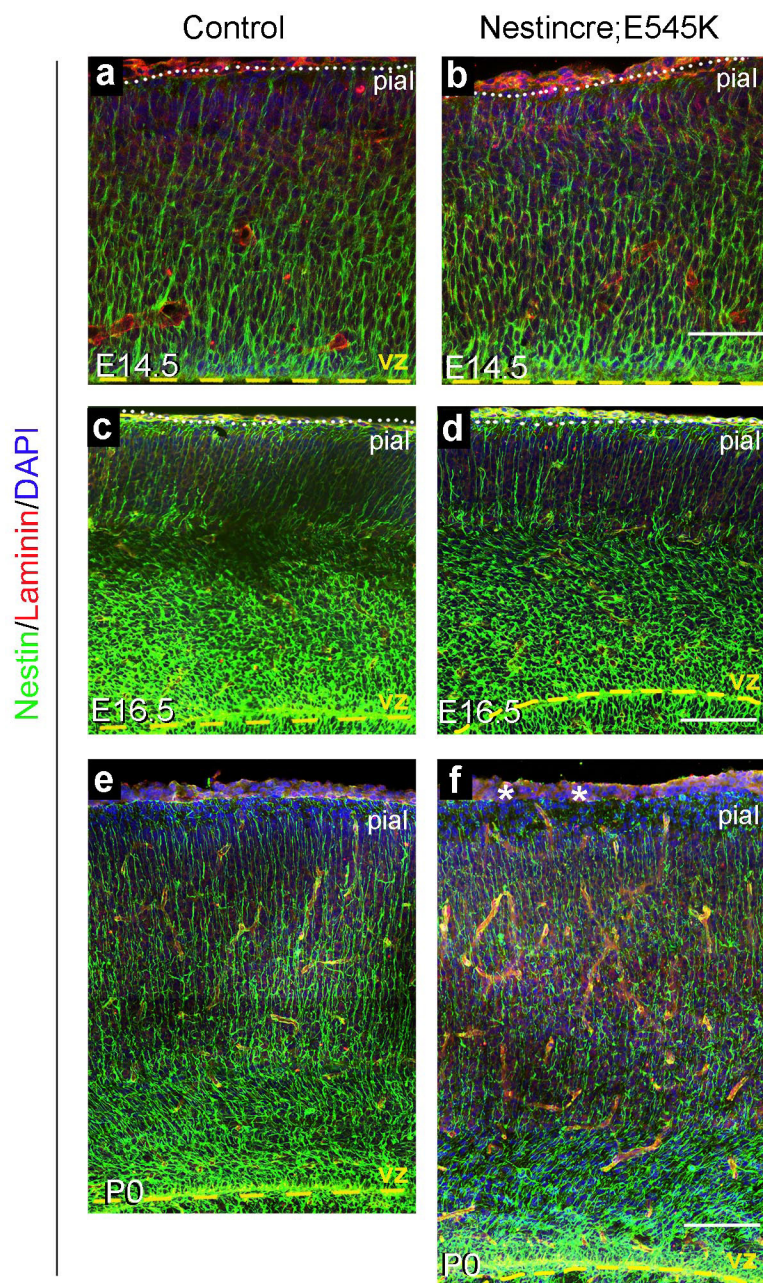

Figure 5 - figure supplement 1

Supplement: supp [file elife-12703-supp-v1.zip]

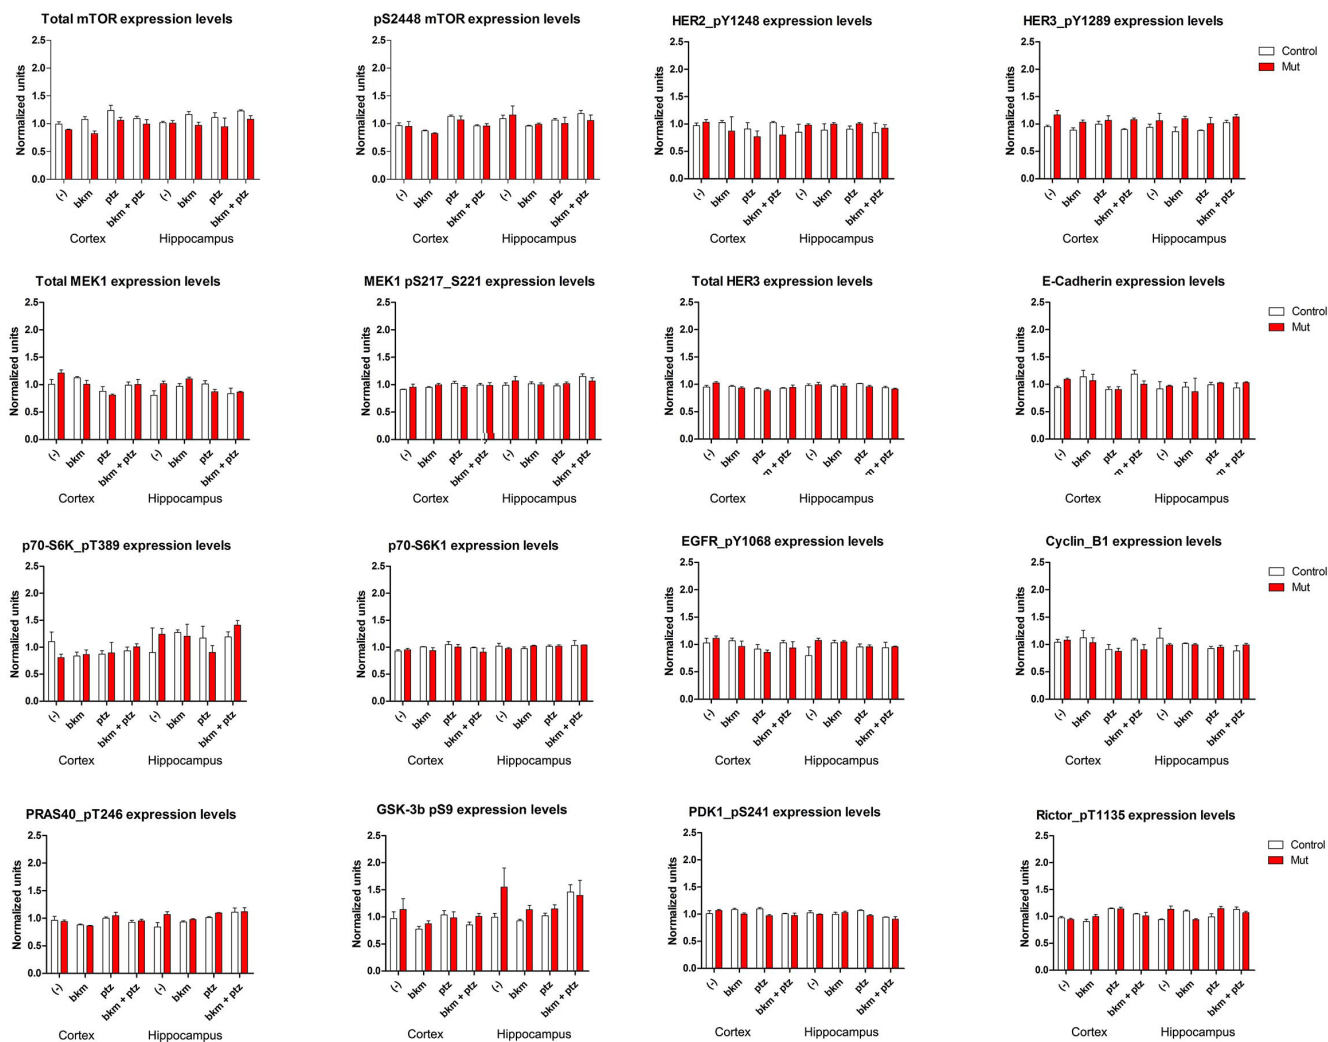

Figure 8 - figure supplement 1

Supplement: supp [file elife-12703-supp-v1.zip]
